# Supplementary material for: Janus-faced EPHB4-associated disorders: novel pathogenic variants and unreported intrafamilial overlapping phenotypes
Source: Genet Med. 2021 Apr 16;23(7):1315–24. doi: 10.1038/s41436-021-01136-7 (PMC8257501; doi:10.1038/s41436-021-01136-7)
Supplement: Supplementary file 1 — Supplementary Table 1 [file 41436_2021_1136_MOESM1_ESM.xlsx]

## Sheet: Supplementary Table 1 - v4
	Supplementary Table 1
	ID	Case	Sex	Age (yr)	NT at 11-13wk (mm)	Fetal Hydrops (wks)	Extent of hydrops	Gestation at birth (wks)	Postnatal resolution of hydrops	Congenital Heart defect	Persistent peripheral lymphedema	Varicose veins	Telangiectasia	Epistaxis‡	Brain MRI	Other comments
	GLDUK	I.2	M	60		No		36		ASD	Yes	Yes				Age of onset of lymphedema: L at 15y, R at 18y. Recurrent lower limb cellulitis in adulthood.
		II.2	F	35		Yes	PE, As, SC	34	Yes	ASD	(Yes)	Yes	No	No		Congenital diaphragmatic hernia, ectopic kidney, neonatal renal failure, splenomegaly, mild LD.
		II.4	F	39		No		38		Small ASD	(Yes)	Yes	Yes	No	Normal	US report: There is saphenopopliteal junction reflux into the short saphenous vein of the right leg.
		II.6	M	ND 21d	3	Yes (20)	PE, PC	34	No (ND 21d)	Normal						Refractory hypotension, renal failure, metabolic acidosis.
		II.7	F	IUD 26wks	3.8	Yes (20)	PE, As, SC	IUD 26		Normal
		III.1	M	13	2.8	Yes (20)	PE, PC	32	Yes	ASD (closed spont.)	No					Pleural fluid was chylous.
		III.2	M	9	Normal	No		40		multiple ASDs	No		Yes	Yes	Normal	Social communication disorder, mild pectus excavatum, recurrent chest infections.
	GLDNOR	II.2*	F	42		?	(Transient SC at birth)	34	(Yes, SC resolved)	Normal	(Yes)	Yes				Transient swelling resolved in first week. Mild neonatal anaemia. Recurrent miscarrages.
		II.3*	F	42		?	(At birth: PE, SC, CT, TC)	34	(Yes)	PFO	(Yes)	Yes				Neonatal anemia. Double uterus, recurrent miscarriages.
		III.5	M	ND 1.5d	2.1	Yes (28)	PE,SC, TCx3	30	No (ND 1.5d)	VSD, ASD, PFO						Anaemic at birth, renal failure.
		III.9	M	11	1.8	Yes (28)	PE, As, SC, TCx4	30	Yes	ASD, PFO (closed spont.)	No	No	No	Yes		Anaemic at birth, small kidneys, stage 3 renal failure, hearing loss.
	FH1	II.2	M	ND 36d	Normal	Yes (29)	PE, PC, TC	31	No (ND 36d)	PFO						No response to any therapy. Fluid from thoracentesis consistent with chylothorax.
	FH2	II.1	F	ND 9wk	2	Yes (30)	PE, As, SC, PC	30	No (ND 9wk)	PDA						No response to any therapy. Lung biopsy showed dysplastic alveoli.
	FH3	II.7	F		1.3	No	(From 26 wks: PE)	40		Normal						Livebirth, lost to further follow up.
	FH4	II.1	M	IUD?	9.5	Yes (20)				ASD						Increased NT and fetal hydrops but with no further details. Probable IUD.
	FH5	I.2	F	40		No				Normal	No	Yes				Mild varicose veins.
		II.1	F	8	Normal	?	(At birth: SC)	38	(Yes)	Normal	No	No				Abdominal circumference @3rd trimester US >97th percentile. Lost lots of fluid in first weeks.
		II.2	M	4	Normal	Yes (30)	As, SC	30	Yes	PDA (possibly ASD)	Yes	No				Fluid drained was chylous. Dysmorphic. Scalp lesion at birth, developmental delay and petechiae.
	VA1	I.2	F	44		No					No	No	Yes	No	Normal	Telangiectasia on face and hands, heavy irregular periods. Thyroid cancer.
		II.1	F	17	Normal	No					No	No	Yes	No	Normal	Telangiectasia and capillary malformation. Heavy irregular periods.
		II.2	F	16	Normal	No					No	No	Yes	Yes	Normal	Telangiectasia and capillary malformations. Recurrent nose bleeds and heavy irregular periods.
	VA2	I.1	M	54		No					No	No	(Yes)	No	Normal	Telangiectasia on lips as a child, not visible on last inspection. Testicular cancer.
		II.1	M	14	Normal	No					No	No	Yes	Yes	Normal	Telangiectasia on lips and hands, nose bleeds (resolved at age 12y).
	PL1	II.2	F		Normal	No					Yes	No				Lymphoscintigraphy demonstrated sluggish lymphatic drainage in both legs.
		II.3	F	16	Normal	No					Yes					Age of onset of lymphedema: L at 18 months, R at later age.
		III.1	F	6	Normal	No					Yes					Early onset (at 2y) unilateral lower limb lymphoedema
